# Supplementary material
Source: MDPI journal article supplement (https://www.mdpi.com/2073-8994/13/4/718)
Supplement: s1 [file s1]

Archive with 1 entries (1 files):
- symmetry-1170276-supplementary.pdf
